# Supplementary material for: Overexpression and Activation of αvβ3 Integrin Differentially Affects TGFβ2 Signaling in Human Trabecular Meshwork Cells
Source: MDPI journal article supplement (doi:10.3390/cells10081923), 2021-07-29
Supplement: s1 [file s1]

Table S6. Commonly downregulated genes and transcripts in cells overexpressing either a wild type (WT $\beta$ 3) or a constitutively active (CA $\beta$ 3)  $\alpha$ v $\beta$ 3 integrin.

Log<sub>2</sub> fold change (FC) values were reported in DGE analysis using EdgeR, and genes and transcripts that demonstrated a Log<sub>2</sub>  $\leq$  -1.5 FC were identified using R statistical computing and graphics software. Genes and transcripts are listed alphabetically.

| Ensembl ID      | Gene Symbol | Log <sub>2</sub> FC WT $\beta$ 3 | Log <sub>2</sub> FC CA $\beta$ 3 | Description                                                      |
|-----------------|-------------|----------------------------------|----------------------------------|------------------------------------------------------------------|
| ENSG00000141338 | ABCA8       | -5.095589317                     | -2.980579945                     | ATP binding cassette subfamily A member 8                        |
| ENSG00000127220 | ABHD8       | -1.734154909                     | -1.859311682                     | abhydrolase domain containing 8                                  |
| ENSG00000265118 | AC134669.1  | -1.854424156                     | -3.046258591                     | novel protein                                                    |
| ENSG00000088543 | C3orf18     | -2.183946766                     | -2.522262488                     | solute carrier family 35 member F6                               |
| ENSG00000136999 | CCN3        | -1.687291937                     | -2.187420855                     | cellular communication network factor 3                          |
| ENSG00000125726 | CD70        | -2.130170234                     | -1.745079339                     | CD70 molecule                                                    |
| ENSG00000128965 | CHAC1       | -4.710473005                     | -3.647274759                     | ChaC glutathione specific gamma-glutamylcyclotransferase 1       |
| ENSG00000174600 | CMKLR1      | -2.074193754                     | -2.226520469                     | chemerin chemokine-like receptor 1                               |
| ENSG00000175197 | DDIT3       | -2.903410373                     | -2.251622005                     | DNA damage inducible transcript 3                                |
| ENSG00000126860 | EVI2A       | -1.806536706                     | -3.217884993                     | ecotropic viral integration site 2A                              |
| ENSG00000132185 | FCRLA       | -1.697799115                     | -2.271069757                     | Fc receptor like A                                               |
| ENSG00000130513 | GDF15       | -1.728136069                     | -2.688561077                     | growth differentiation factor 15                                 |
| ENSG00000180353 | HCLS1       | -1.577666113                     | -1.900570542                     | hematopoietic cell-specific Lyn substrate 1                      |
| ENSG00000163395 | IGFN1       | -3.581253567                     | -5.593492525                     | immunoglobulin-like and fibronectin type III domain containing 1 |
| ENSG00000150782 | IL18        | -1.695609618                     | -3.747248872                     | interleukin 18                                                   |
| ENSG00000136826 | KLF4        | -1.6581479                       | -2.586682718                     | Kruppel like factor 4                                            |
| ENSG00000260676 | LINC01541   | -8.921016897                     | -7.387253708                     | long intergenic non-protein coding RNA 1541                      |
| ENSG00000259518 | LINC01583   | -1.67473765                      | -1.743581189                     | long intergenic non-protein coding RNA 1583                      |

|                 |           |              |              |                                                   |
|-----------------|-----------|--------------|--------------|---------------------------------------------------|
| ENSG00000175471 | MCTP1     | -1.61723307  | -2.038949477 | multiple C2 and transmembrane domain containing 1 |
| ENSG00000117122 | MFAP2     | -1.889266239 | -4.017772303 | microfibril associated protein 2                  |
| ENSG00000196611 | MMP1      | -3.585185871 | -6.351660168 | matrix metalloproteinase 1                        |
| ENSG00000144821 | MYH15     | -1.561878888 | -2.632268215 | myosin heavy chain 15                             |
| ENSG00000091129 | NRCAM     | -2.311441565 | -2.47152090  | neuronal cell adhesion molecule                   |
| ENSG00000181195 | PENK      | -4.956812575 | -4.22864203  | proenkephalin                                     |
| ENSG00000182621 | PLCB1     | -4.854838303 | -2.001679576 | phospholipase C beta 1                            |
| ENSG00000099256 | PRTFDC1   | -1.739074747 | -2.158157087 | phosphoribosyl transferase domain containing 1    |
| ENSG00000263426 | RN7SL471P | -1.537698057 | -1.586087934 | RNA, 7SL, cytoplasmic 471, pseudogene             |
| ENSG00000128228 | SDF2L1    | -1.901822192 | -2.276289361 | stromal cell derived factor 2 like 1              |
| ENSG00000112837 | TBX18     | -2.580444836 | -1.734454771 | T-box 18                                          |
| ENSG00000100234 | TIMP3     | -1.572887624 | -2.021798676 | TIMP metalloproteinase inhibitor 3                |
| ENSG00000041982 | TNC       | -2.246990957 | -3.589927301 | tenascin C                                        |
| ENSG00000121236 | TRIM6     | -4.277405775 | -2.617367483 | tripartite motif containing 6                     |
| ENSG00000261040 | WFDC21P   | -1.654458803 | -1.906100495 | WAP four-disulfide core domain 21, pseudogene     |
| ENSG00000164684 | ZNF704    | -2.670403494 | -1.627879127 | zinc finger protein 704                           |
