# Supplementary material for: Overexpression and Activation of αvβ3 Integrin Differentially Affects TGFβ2 Signaling in Human Trabecular Meshwork Cells
Source: MDPI journal article supplement (doi:10.3390/cells10081923), 2021-07-29
Supplement: s1 [file s1]

Table S9: Genes differentially expressed in CA $\beta$ 3 cells that are targeted by TGF $\beta$ 2, BMP and/or Wnt signaling.

Genes differentially expressed in CA $\beta$ 3 cells were entered into the EMT-Regulome database (<http://www.medsysbio.org/EMTRegulome>) to identify those that are targeted by signaling involving TGF $\beta$ 2, BMP and/or Wnt pathways (no citations indicated). In those instances where the database did not indicate an association with any pathway(s), supplementary literature searches were performed. The Log<sub>2</sub> FC relative to WT $\beta$ 3 cells is indicated for each gene.

| Functional Classification | Gene Name     | Protein Name                                        | CA $\beta$ 3-EV Log <sub>2</sub> FC | Role in TGF $\beta$ , BMP or Wnt signaling          |
|---------------------------|---------------|-----------------------------------------------------|-------------------------------------|-----------------------------------------------------|
| <b>Transcription</b>      |               |                                                     |                                     |                                                     |
|                           | <i>FOSL1</i>  | FOS like 1, AP-1 transcription factor subunit       | -1.98                               | Targeted by TGF $\beta$ [118]; Wnt [119]            |
|                           | <i>ISL1</i>   | ISL LIM Homeobox 1                                  | 8.81                                | Targeted by TGF $\beta$ ; BMP [120]; Wnt [121]      |
|                           | <i>MYOCD</i>  | myocardin                                           | 2.94                                | Targeted by TGF $\beta$                             |
|                           | <i>PAX6</i>   | paired box 6                                        | 2.78                                | Targeted by TGF $\beta$ [122]; BMP [123]; Wnt [124] |
|                           | <i>SOX5</i>   | SRY-box 5                                           | 3.49                                | Targeted by TGF $\beta$ ; BMP                       |
|                           | <i>STAT5A</i> | signal transducer and activator of transcription 5A | 3.32                                | Targeted by TGF $\beta$                             |
|                           | <i>ZNF117</i> | zinc finger protein 117                             | 2.34                                | Targeted by TGF $\beta$                             |
|                           | <i>ZNF347</i> | zinc finger protein 347                             | 1.78                                | Targeted by TGF $\beta$                             |
|                           | <i>ZNF608</i> | zinc finger protein 608                             | 2.63                                | Targeted by TGF $\beta$                             |
|                           | <i>ZNF641</i> | zinc finger protein 641                             | 2.17                                | Targeted by TGF $\beta$ ; BMP                       |
| <b>Adhesion</b>           |               |                                                     |                                     |                                                     |
|                           | <i>BMPER</i>  | BMP binding endothelial regulator                   | -2.07                               | Targeted by TGF $\beta$                             |
|                           | <i>CDH6</i>   | K-cadherin                                          | 1.97                                | Targeted by TGF $\beta$ ; BMP                       |
|                           | <i>CNTN3</i>  | contactin 3                                         | -3.17                               | Targeted by TGF $\beta$                             |
|                           | <i>DCHS1</i>  | dachsous cadherin-related 1                         | 3.65                                | Targeted by TGF $\beta$ ; BMP                       |
|                           | <i>NCAM2</i>  | neuronal cell adhesion molecule 2                   | 1.78                                | Targeted by TGF $\beta$                             |
|                           | <i>NRCAM</i>  | neuronal cell adhesion molecule                     | -2.47                               | Targeted by TGF $\beta$ ; BMP                       |

|                     |                 |                                                                 |       |                                           |
|---------------------|-----------------|-----------------------------------------------------------------|-------|-------------------------------------------|
|                     | <i>PCDH1</i>    | protocadherin 1                                                 | 2.47  | Targeted by TGFβ                          |
|                     | <i>RGMA</i>     | repulsive guidance molecule<br>BMP co-receptor a                | 2.16  | Targeted by TGFβ                          |
|                     | <i>SEMA6A</i>   | semaphorin 6A                                                   | 1.55  | Targeted by TGFβ;<br>BMP                  |
|                     | <i>SEMA6D</i>   | semaphorin 6D                                                   | 4.35  | Targeted by TGFβ;<br>BMP                  |
|                     | <i>VCAM1</i>    | vascular cell adhesion<br>molecule 1                            | -2.07 | Targeted by TGFβ;<br>BMP                  |
| <b>ECM</b>          |                 |                                                                 |       |                                           |
|                     | <i>MMP1</i>     | matrix metalloproteinase 1                                      | -6.35 | Targeted by TGFβ;<br>BMP [125]; Wnt [126] |
|                     | <i>SERPINE1</i> | serpin family E member 1                                        | -1.71 | Targeted by TGFβ                          |
|                     | <i>TLL1</i>     | tolloid like 1                                                  | 4.19  | Targeted by TGFβ                          |
|                     | <i>TNC</i>      | tenascin C                                                      | -3.59 | Targets TGFβ [115]                        |
| <b>Cytokines</b>    |                 |                                                                 |       |                                           |
|                     | <i>BMP3</i>     | bone morphogenetic protein<br>3                                 | 3.54  | Targeted by TGFβ;<br>BMP                  |
|                     | <i>IL11</i>     | interleukin 11                                                  | -2.05 | Targeted by TGFβ                          |
|                     | <i>INHBB</i>    | inhibin subunit beta B                                          | -1.65 | Targeted by TGFβ;<br>BMP4                 |
|                     | <i>SMAD6</i>    | SMAD family member 6                                            | 2.19  | Targeted by TGFβ                          |
|                     | <i>TGFB2</i>    | transforming growth factor<br>beta 2                            | 1.63  | Targeted by BMP [73]                      |
|                     | <i>TNFAIP3</i>  | TNF alpha induced protein 3                                     | -1.92 | Targeted by TGFβ;<br>BMP                  |
|                     | <i>WNT7B</i>    | Wnt family member 7B                                            | 1.82  | Targeted by TGFβ<br>[127]; BMP [128]      |
|                     | <i>WNT8B</i>    | Wnt family member 8B                                            | 1.90  | Targeted by TGFβ;<br>BMP                  |
| <b>Cytoskeleton</b> |                 |                                                                 |       |                                           |
|                     | <i>AGAP2</i>    | ArfGAP with GTPase<br>domain, ankyrin repeat and<br>PH domain 2 | 1.77  | Targeted by TGFβ                          |
|                     | <i>ARHGAP22</i> | Rho GTPase activating<br>protein 22                             | 2.24  | Targeted by TGFβ                          |
|                     | <i>ARHGAP24</i> | Rho GTPase activating<br>protein 24                             | 2.04  | Targeted by BMP                           |
|                     | <i>GAS7</i>     | growth arrest specific 7                                        | 3.21  | Targeted by TGFβ                          |
|                     | <i>INA</i>      | internexin neuronal<br>intermediate filament protein<br>alpha   | 1.93  | Targeted by TGFβ                          |
|                     | <i>IQGAP2</i>   | IQ motif containing GTPase<br>activating protein 2              | 2.59  | Targeted by TGFβ;<br>Wnt [129]            |
|                     | <i>MCF2L</i>    | MCF.2 cell line derived<br>transforming sequence like           | 2.44  | Targeted by BMP                           |

|                      |                                              |       |                           |
|----------------------|----------------------------------------------|-------|---------------------------|
| <i>MYH15</i>         | myosin heavy chain 15                        | -2.10 | Targeted by TGFβ<br>[130] |
| <i>NHS</i>           | NHS actin remodeling<br>regulator            | -1.02 | Targeted by TGFβ;<br>BMP  |
| <i>RAPGEF4</i>       | Rap guanine nucleotide<br>exchange factor 4  | 2.26  | Targeted by TGFβ          |
| <i>RUNDC3A</i>       | RUN domain containing 3A                     | 1.68  | Targeted by TGFβ          |
| <i>SORBS1</i>        | sorbin and SH3 domain<br>containing 1        | 2.15  | Targeted by TGFβ;<br>BMP  |
| <i>SRGAP3</i>        | SLIT-ROBO Rho GTPase<br>activating protein 3 | 2.81  | Targeted by BMP           |
| <b>Miscellaneous</b> |                                              |       |                           |
| <i>TXNIP</i>         | thioredoxin interacting<br>protein           | 3.64  | Targeted by TGFβ;<br>BMP  |
| <i>MBP</i>           | myelin basic protein                         | -2.62 | Targeted by TGFβ<br>[131] |
