# Supplementary material for: Overexpression and Activation of αvβ3 Integrin Differentially Affects TGFβ2 Signaling in Human Trabecular Meshwork Cells
Source: MDPI journal article supplement (doi:10.3390/cells10081923), 2021-07-29
Supplement: s1 [file s1]

Table S5. Commonly upregulated genes and transcripts in cells overexpressing either a wild type (WT $\beta$ 3) or a constitutively active (CA $\beta$ 3)  $\alpha$ v $\beta$ 3 integrin.

Log<sub>2</sub> fold change (FC) values were reported in DGE analysis using EdgeR, and genes and transcripts that demonstrated a Log<sub>2</sub>  $\geq$  1.5 FC were identified using R statistical computing and graphics software. Genes and transcripts are listed alphabetically.

| Ensembl ID      | Gene Symbol | Log <sub>2</sub> FC WT $\beta$ 3 | Log <sub>2</sub> FC CA $\beta$ 3 | Description                                                     |
|-----------------|-------------|----------------------------------|----------------------------------|-----------------------------------------------------------------|
| ENSG00000175899 | A2M         | 2.546851196                      | 2.190721295                      | alpha-2-macroglobulin                                           |
| ENSG00000270823 | AC007938.2  | 1.721227681                      | 2.333318666                      | novel transcript, antisense to MEST                             |
| ENSG00000249839 | AC011330.1  | 3.371762947                      | 2.558261417                      | histidine acid phosphatase domain containing 2A pseudogene      |
| ENSG00000259753 | AC068234.1  | 9.595384645                      | 6.518827194                      | novel transcript                                                |
| ENSG00000254673 | AC110275.1  | 1.569670313                      | 1.553657788                      | novel transcript                                                |
| ENSG00000164742 | ADCY1       | 2.155402951                      | 1.98806475                       | adenylate cyclase 1                                             |
| ENSG00000169083 | AR          | 1.743956491                      | 2.023372026                      | androgen receptor                                               |
| ENSG00000158321 | AUTS2       | 2.072386152                      | 3.522554032                      | AUTS2, activator of transcription and developmental regulator   |
| ENSG00000188848 | BEND4       | 3.026227118                      | 4.745703048                      | BEN domain containing 4                                         |
| ENSG00000152785 | BMP3        | 1.523561956                      | 3.820178962                      | bone morphogenetic protein 3                                    |
| ENSG00000224389 | C4B         | 1.511639907                      | 2.296971491                      | complement C4B (Chido blood group)                              |
| ENSG00000117477 | CCDC181     | 2.265861017                      | 3.025809089                      | coiled-coil domain containing 181                               |
| ENSG00000128510 | CPA4        | 1.511030785                      | 3.022971372                      | carboxypeptidase A4                                             |
| ENSG00000135144 | DTX1        | 2.22806022                       | 3.024584843                      | deltex E3 ubiquitin ligase 1                                    |
| ENSG00000130054 | FAM155B     | 2.633270588                      | 2.493155194                      | family with sequence similarity 155 member B                    |
| ENSG00000054983 | GALC        | 2.075155065                      | 3.096050797                      | galactosylceramidase                                            |
| ENSG00000110328 | GALNT18     | 2.358499405                      | 2.514794853                      | polypeptide N-acetylgalactosaminyltransferase 18                |
| ENSG00000007237 | GAS7        | 1.512978922                      | 3.210195626                      | growth arrest specific 7                                        |
| ENSG00000124194 | GDAP1L1     | 1.549983559                      | 2.648958028                      | ganglioside induced differentiation associated protein 1 like 1 |
| ENSG00000112964 | GHR         | 3.441519165                      | 2.810438978                      | growth hormone receptor                                         |

|                 |          |             |             |                                                         |
|-----------------|----------|-------------|-------------|---------------------------------------------------------|
| ENSG00000179855 | GIPC3    | 1.821006768 | 2.428827304 | GIPC PDZ domain containing family member 3              |
| ENSG00000065325 | GLP2R    | 1.941295934 | 2.365404281 | glucagon like peptide 2 receptor                        |
| ENSG00000170412 | GPRC5C   | 1.837777211 | 2.558563065 | G protein-coupled receptor class C group 5 member C     |
| ENSG00000183454 | GRIN2A   | 2.183723762 | 2.107439598 | glutamate ionotropic receptor NMDA type subunit 2A      |
| ENSG00000164116 | GUCY1A1  | 1.521115577 | 3.361417459 | guanylate cyclase 1 soluble subunit alpha 1             |
| ENSG00000130600 | H19      | 1.523468872 | 2.269401426 | H19, imprinted maternally expressed transcript          |
| ENSG00000274618 | HIST1H4F | 1.632699824 | 2.340301588 | histone cluster 1 H4 family member f                    |
| ENSG00000125430 | HS3ST3B1 | 1.776234593 | 2.107503126 | heparan sulfate-glucosamine 3-sulfotransferase 3B1      |
| ENSG00000142149 | HUNK     | 1.720255649 | 2.998820911 | hormonally up-regulated Neu-associated kinase           |
| ENSG00000259207 | ITGB3    | 6.688975307 | 3.887676455 | integrin subunit beta 3                                 |
| ENSG00000055118 | KCNH2    | 1.753339719 | 2.014887719 | potassium voltage-gated channel subfamily H member 2    |
| ENSG00000003096 | KLHL13   | 3.485927333 | 2.470729486 | kelch like family member 13                             |
| ENSG00000169783 | LINGO1   | 1.509940943 | 2.335313903 | leucine rich repeat and Ig domain containing 1          |
| ENSG00000136944 | LMX1B    | 1.524723261 | 1.658412873 | LIM homeobox transcription factor 1 beta                |
| ENSG00000129295 | LRRC6    | 1.990976674 | 2.066274564 | leucine rich repeat containing 6                        |
| ENSG00000126217 | MCF2L    | 1.749244740 | 2.43608757  | MCF.2 cell line derived transforming sequence like      |
| ENSG00000130675 | MNX1     | 2.423211431 | 4.367116869 | motor neuron and pancreas homeobox 1                    |
| ENSG00000151322 | NPAS3    | 1.795904567 | 1.737236428 | neuronal PAS domain protein 3                           |
| ENSG00000124374 | PAIP2B   | 1.99877162  | 2.289621046 | poly(A) binding protein interacting protein 2B          |
| ENSG00000120324 | PCDHB10  | 1.925999419 | 3.392317423 | protocadherin beta 10                                   |
| ENSG00000120328 | PCDHB12  | 1.614402947 | 2.547812606 | protocadherin beta 12                                   |
| ENSG00000187372 | PCDHB13  | 1.590649225 | 2.369901446 | protocadherin beta 13                                   |
| ENSG00000272674 | PCDHB16  | 1.995728907 | 2.085085236 | protocadherin beta 16                                   |
| ENSG00000113209 | PCDHB5   | 1.560931899 | 2.252456238 | protocadherin beta 5                                    |
| ENSG00000102109 | PCSK1N   | 2.625166846 | 2.641351326 | proprotein convertase subtilisin/kexin type 1 inhibitor |
| ENSG00000114631 | PODXL2   | 2.096004428 | 3.69766938  | podocalyxin like 2                                      |

|                 |          |             |             |                                                                                                            |
|-----------------|----------|-------------|-------------|------------------------------------------------------------------------------------------------------------|
| ENSG00000074211 | PPP2R2C  | 2.255839625 | 2.103603309 | protein phosphatase 2<br>regulatory subunit Bgamma                                                         |
| ENSG00000103485 | QPRT     | 3.087796637 | 3.408612035 | quinolinate<br>phosphoribosyltransferase                                                                   |
| ENSG00000091428 | RAPGEF4  | 1.721583517 | 2.255201136 | Rap guanine nucleotide<br>exchange factor 4                                                                |
| ENSG00000165731 | RET      | 1.831877241 | 2.411426246 | ret proto-oncogene                                                                                         |
| ENSG00000177181 | RIMKLA   | 2.421494183 | 2.883132189 | ribosomal modification<br>protein rimK like family<br>member A                                             |
| ENSG00000092096 | SLC22A17 | 1.601709055 | 1.95807434  | solute carrier family 22<br>member 17                                                                      |
| ENSG00000080503 | SMARCA2  | 2.152768611 | 2.318285941 | SWI/SNF related, matrix<br>associated, actin dependent<br>regulator of chromatin,<br>subfamily a, member 2 |
| ENSG00000101955 | SRPX     | 2.630509847 | 2.525241645 | sushi repeat containing<br>protein X-linked                                                                |
| ENSG00000196562 | SULF2    | 1.887350742 | 2.277392509 | sulfatase 2                                                                                                |
| ENSG00000170379 | TCAF2    | 1.755030163 | 1.827709726 | TRPM8 channel associated<br>factor 2                                                                       |
| ENSG00000006042 | TMEM98   | 1.718692092 | 2.292466039 | transmembrane protein 98                                                                                   |
| ENSG00000255690 | TRIL     | 4.268021204 | 3.746862554 | TLR4 interactor with leucine<br>rich repeats                                                               |
| ENSG00000162738 | VANGL2   | 3.262101997 | 3.758007605 | VANGL planar cell polarity<br>protein 2                                                                    |
| ENSG00000132821 | VSTM2L   | 2.740009491 | 2.597112733 | V-set and transmembrane<br>domain containing 2 like                                                        |
| ENSG00000126970 | ZC4H2    | 1.560779227 | 1.886731068 | zinc finger C4H2-type<br>containing                                                                        |
| ENSG00000152926 | ZNF117   | 1.905433721 | 2.342995159 | zinc finger protein 117                                                                                    |
| ENSG00000197928 | ZNF677   | 1.783347861 | 1.662160198 | zinc finger protein 677                                                                                    |
| ENSG00000198429 | ZNF69    | 2.417505808 | 2.893734882 | zinc finger protein 69                                                                                     |
| ENSG00000188227 | ZNF793   | 2.017296376 | 2.443964647 | zinc finger protein 793                                                                                    |
