# Supplementary material for: Overexpression and Activation of αvβ3 Integrin Differentially Affects TGFβ2 Signaling in Human Trabecular Meshwork Cells
Source: MDPI journal article supplement (doi:10.3390/cells10081923), 2021-07-29
Supplement: s1 [file s1]

Table S2. Genes and transcripts uniquely downregulated in cells overexpressing a constitutively active  $\alpha v\beta 3$  integrin (CA $\beta 3$ ).

Log<sub>2</sub> fold change (FC) values were reported in DGE analysis using EdgeR, and genes and transcripts that demonstrated a Log<sub>2</sub>  $\leq$  -1.5 FC were identified using R statistical computing and graphics software. Genes and transcripts are listed alphabetically.

| Ensembl ID      | Gene Symbol | Log <sub>2</sub> FC | Description                                                                |
|-----------------|-------------|---------------------|----------------------------------------------------------------------------|
| ENSG00000268812 | AC004264.1  | -1.991396937        | novel transcript, antisense to LIF                                         |
| ENSG00000254887 | AC010247.1  | -1.820701391        | novel transcript, antisense to POU2F2                                      |
| ENSG00000256861 | AC048338.1  | -8.836046928        | novel transcript                                                           |
| ENSG00000258232 | AC125611.3  | -10.75481719        | novel transcript, antisense to TUBA1C                                      |
| ENSG00000215861 | AC245297.1  | -1.828444904        | phosphodiesterase 4D interacting protein (myomegalin) (PDE4DIP) pseudogene |
| ENSG00000224945 | AL353150.1  | -2.211061382        | novel transcript                                                           |
| ENSG00000154065 | ANKRD29     | -1.806241919        | ankyrin repeat domain 29                                                   |
| ENSG00000138772 | ANXA3       | -3.09451016         | annexin A3                                                                 |
| ENSG00000138639 | ARHGAP24    | -2.039246148        | Rho GTPase activating protein 24                                           |
| ENSG00000184867 | ARMCX2      | -2.010051376        | armadillo repeat containing X-linked 2                                     |
| ENSG00000023445 | BIRC3       | -1.751782753        | baculoviral IAP repeat containing 3                                        |
| ENSG00000164619 | BMPER       | -2.067122128        | BMP binding endothelial regulator                                          |
| ENSG00000169594 | BNC1        | -1.8888467          | basonuclin 1                                                               |
| ENSG00000120217 | CD274       | -1.829161111        | CD274 molecule                                                             |
| ENSG00000163814 | CDCP1       | -3.72977362         | CUB domain containing protein 1                                            |
| ENSG00000183196 | CHST6       | -1.692985225        | carbohydrate sulfotransferase 6                                            |
| ENSG00000147119 | CHST7       | -1.814708957        | carbohydrate sulfotransferase 7                                            |
| ENSG00000113805 | CNTN3       | -3.173118934        | contactin 3                                                                |
| ENSG00000197467 | COL13A1     | -1.64042802         | collagen type XIII alpha 1 chain                                           |
| ENSG00000108342 | CSF3        | -3.690256759        | colony stimulating factor 3                                                |
| ENSG00000163739 | CXCL1       | -1.991292869        | C-X-C motif chemokine ligand 1                                             |
| ENSG00000081041 | CXCL2       | -2.213041858        | C-X-C motif chemokine ligand 2                                             |
| ENSG00000163734 | CXCL3       | -3.003403221        | C-X-C motif chemokine ligand 3                                             |
| ENSG00000163735 | CXCL5       | -1.860018019        | C-X-C motif chemokine ligand 5                                             |
| ENSG00000169429 | CXCL8       | -2.853844759        | C-X-C motif chemokine ligand 8                                             |
| ENSG00000107984 | DKK1        | -1.914148292        | dickkopf WNT signaling pathway inhibitor 1                                 |
| ENSG00000128590 | DNAJB9      | -1.558079736        | DnaJ heat shock protein family (Hsp40) member B9                           |
| ENSG00000187957 | DNER        | -1.781751986        | delta/notch like EGF repeat containing                                     |
| ENSG00000134769 | DTNA        | -2.34651843         | dystrobrevin alpha                                                         |
| ENSG00000138166 | DUSP5       | -1.573654655        | dual specificity phosphatase 5                                             |
| ENSG00000134531 | EMP1        | -1.875691721        | epithelial membrane protein 1                                              |
| ENSG00000185862 | EVI2B       | -1.98384939         | ecotropic viral integration site 2B                                        |

|                 |           |              |                                                        |
|-----------------|-----------|--------------|--------------------------------------------------------|
| ENSG00000064655 | EYA2      | -2.063825752 | EYA transcriptional coactivator and phosphatase 2      |
| ENSG00000103089 | FA2H      | -1.516395866 | fatty acid 2-hydroxylase                               |
| ENSG00000154319 | FAM167A   | -2.22351973  | family with sequence similarity 167 member A           |
| ENSG00000162746 | FCRLB     | -1.582633139 | Fc receptor like B                                     |
| ENSG00000175592 | FOSL1     | -1.983301242 | FOS like 1, AP-1 transcription factor subunit          |
| ENSG00000174500 | GCSAM     | -1.564754727 | germinal center associated signaling and motility      |
| ENSG00000166923 | GREM1     | -1.965465728 | gremlin 1, DAN family BMP antagonist                   |
| ENSG00000189369 | GSPT2     | -2.811460806 | G1 to S phase transition 2                             |
| ENSG00000274290 | HIST1H2BE | -2.511407222 | histone cluster 1 H2B family member e                  |
| ENSG00000115756 | HPCAL1    | -1.543022612 | hippocalcin like 1                                     |
| ENSG00000148680 | HTR7      | -1.585619731 | 5-hydroxytryptamine receptor 7                         |
| ENSG00000095752 | IL11      | -2.047710214 | interleukin 11                                         |
| ENSG00000125538 | IL1B      | -3.954943908 | interleukin 1 beta                                     |
| ENSG00000164509 | IL31RA    | -3.457925362 | interleukin 31 receptor A                              |
| ENSG00000163083 | INHBB     | -1.648769502 | inhibin subunit beta B                                 |
| ENSG00000151364 | KCTD14    | -2.789059168 | potassium channel tetramerization domain containing 14 |
| ENSG00000178202 | KDELC2    | -1.718428643 | KDEL motif containing 2                                |
| ENSG00000127528 | KLF2      | -1.538195537 | Kruppel like factor 2                                  |
| ENSG00000205809 | KLRC2     | -1.678061452 | killer cell lectin like receptor C2                    |
| ENSG00000128342 | LIF       | -2.572899451 | LIF, interleukin 6 family cytokine                     |
| ENSG00000246430 | LINC00968 | -1.790599633 | long intergenic non-protein coding RNA 968             |
| ENSG00000242147 | LINC02657 | -1.675213447 | long intergenic non-protein coding RNA 2657            |
| ENSG00000110031 | LPXN      | -1.507356275 | leupaxin                                               |
| ENSG00000153714 | LURAP1L   | -2.424505767 | leucine rich adaptor protein 1 like                    |
| ENSG00000185022 | MAFF      | -1.841816751 | MAF bZIP transcription factor F                        |
| ENSG00000197971 | MBP       | -2.622446775 | myelin basic protein                                   |
| ENSG00000168389 | MFSD2A    | -1.599721227 | major facilitator superfamily domain containing 2A     |
| ENSG00000253522 | MIR3142HG | -1.594581074 | MIR3142 host gene                                      |
| ENSG00000196549 | MME       | -1.503242387 | membrane metalloendopeptidase                          |
| ENSG00000102854 | MSLN      | -1.602678703 | mesothelin                                             |
| ENSG00000133055 | MYBPH     | -1.519648684 | myosin binding protein H                               |
| ENSG00000229644 | NAMPTP1   | -1.545856696 | nicotinamide phosphoribosyltransferase pseudogene 1    |
| ENSG00000122585 | NPY       | -2.570075417 | neuropeptide Y                                         |
| ENSG00000118257 | NRP2      | -2.271274726 | neuropilin 2                                           |
| ENSG00000177144 | NUDT4B    | -1.529161539 | nudix hydrolase 4B                                     |
| ENSG00000226328 | NUP50-DT  | -2.144345686 | NUP50 divergent transcript                             |

|                 |            |              |                                                           |
|-----------------|------------|--------------|-----------------------------------------------------------|
| ENSG00000137819 | PAQR5      | -1.861771537 | progesterone and adipoQ receptor family member 5          |
| ENSG00000188677 | PARVB      | -2.553371268 | parvin beta                                               |
| ENSG00000253731 | PCDHGA6    | -1.602625701 | protocadherin gamma subfamily A, 6                        |
| ENSG00000175426 | PCSK1      | -1.725823785 | proprotein convertase subtilisin/kexin type 1             |
| ENSG00000258429 | PDF        | -1.594087122 | peptide deformylase, mitochondrial                        |
| ENSG00000177614 | PGBD5      | -2.035902229 | piggyBac transposable element derived 5                   |
| ENSG00000181649 | PHLDA2     | -1.897784122 | pleckstrin homology like domain family A member 2         |
| ENSG00000100558 | PLEK2      | -2.061318736 | pleckstrin 2                                              |
| ENSG00000119698 | PPP4R4     | -1.786939032 | protein phosphatase 4 regulatory subunit 4                |
| ENSG00000106772 | PRUNE2     | -2.019538158 | prune homolog 2 with BCH domain                           |
| ENSG00000148344 | PTGES      | -2.23429819  | prostaglandin E synthase                                  |
| ENSG00000151490 | PTPRO      | -1.79152749  | protein tyrosine phosphatase, receptor type O             |
| ENSG00000041353 | RAB27B     | -1.567298236 | RAB27B, member RAS oncogene family                        |
| ENSG00000104856 | RELB       | -1.508096473 | RELB proto-oncogene, NF-kB subunit                        |
| ENSG00000277739 | RF00002    | -1.660318574 | NA                                                        |
| ENSG00000196460 | RFX8       | -3.976835018 | RFX family member 8, lacking RFX DNA binding domain       |
| ENSG00000173156 | RHOD       | -1.734142397 | ras homolog family member D                               |
| ENSG00000278771 | RN7SL3     | -2.010134682 | RNA, 7SL, cytoplasmic 3                                   |
| ENSG00000278189 | RNA5-8SN1  | -1.660318578 | RNA, 5.8S ribosomal N1                                    |
| ENSG00000278233 | RNA5-8SN2  | -1.660318581 | RNA, 5.8S ribosomal N2                                    |
| ENSG00000275215 | RNA5-8SN3  | -1.660318568 | RNA, 5.8S ribosomal N3                                    |
| ENSG00000206585 | RNVU1-7    | -1.823893721 | RNA, variant U1 small nuclear 7                           |
| ENSG00000197956 | S100A6     | -1.618913379 | S100 calcium binding protein A6                           |
| ENSG00000189001 | SBSN       | -1.870212129 | suprabasin                                                |
| ENSG00000171951 | SCG2       | -2.102123269 | secretogranin II                                          |
| ENSG00000106366 | SERPINE1   | -1.705199473 | serpin family E member 1                                  |
| ENSG00000118473 | SGIP1      | -1.991229357 | SH3 domain GRB2 like endophilin interacting protein 1     |
| ENSG00000189410 | SH2D5      | -1.557658489 | SH2 domain containing 5                                   |
| ENSG00000259863 | SH3RF3-AS1 | -1.614951605 | SH3RF3 antisense RNA 1                                    |
| ENSG00000142178 | SIK1       | -1.501009133 | salt inducible kinase 1                                   |
| ENSG00000265185 | SNORD3B-1  | -1.538402261 | small nucleolar RNA, C/D box 3B-1                         |
| ENSG00000262074 | SNORD3B-2  | -1.6161787   | small nucleolar RNA, C/D box 3B-2                         |
| ENSG00000079263 | SP140      | -1.877421242 | SP140 nuclear body protein                                |
| ENSG00000134668 | SPOCD1     | -2.582502785 | SPOC domain containing 1                                  |
| ENSG00000117069 | ST6GALNAC5 | -1.736569499 | ST6 N-acetylgalactosaminide alpha-2,6-sialyltransferase 5 |
| ENSG00000164674 | SYTL3      | -1.604198478 | synaptotagmin like 3                                      |
| ENSG00000158246 | TENT5B     | -2.138860226 | terminal nucleotidyltransferase 5B                        |

|                 |         |              |                                                      |
|-----------------|---------|--------------|------------------------------------------------------|
| ENSG00000133863 | TEX15   | -2.577584943 | testis expressed 15, meiosis and synapsis associated |
| ENSG00000145107 | TM4SF19 | -2.005702078 | transmembrane 4 L six family member 19               |
| ENSG00000249992 | TMEM158 | -2.126264863 | transmembrane protein 158 (gene/pseudogene)          |
| ENSG00000118503 | TNFAIP3 | -1.917747885 | TNF alpha induced protein 3                          |
| ENSG00000123610 | TNFAIP6 | -2.804564769 | TNF alpha induced protein 6                          |
| ENSG00000179046 | TRIML2  | -1.952947411 | tripartite motif family like 2                       |
| ENSG00000162692 | VCAM1   | -2.070676141 | vascular cell adhesion molecule 1                    |
| ENSG00000112715 | VEGFA   | -2.110359862 | vascular endothelial growth factor A                 |
| ENSG00000136059 | VILL    | -3.303321858 | villin like                                          |
| ENSG00000188064 | WNT7B   | -1.820245207 | Wnt family member 7B                                 |
