# Supplementary material for: Overexpression and Activation of αvβ3 Integrin Differentially Affects TGFβ2 Signaling in Human Trabecular Meshwork Cells
Source: MDPI journal article supplement (doi:10.3390/cells10081923), 2021-07-29
Supplement: s1 [file s1]

Table S4. Genes and transcripts uniquely downregulated in cells overexpressing a wild type  $\alpha v\beta 3$  integrin (WT $\beta 3$ ).

Log<sub>2</sub> fold change (FC) values were reported in DGE analysis using EdgeR, and genes and transcripts that demonstrated a Log<sub>2</sub>  $\leq$  -1.5 FC were identified using R statistical computing and graphics software. Genes and transcripts are listed alphabetically.

| Ensembl ID      | Gene Symbol | Log <sub>2</sub> FC | Description                                                   |
|-----------------|-------------|---------------------|---------------------------------------------------------------|
| ENSG00000261114 | AC012181.1  | -1.648797136        | novel transcript, sense intronic to HERPUD1                   |
| ENSG00000226084 | AC113935.1  | -1.879357636        | ribosomal protein L17 (RPL17) pseudogene                      |
| ENSG00000163017 | ACTG2       | -2.039849424        | actin, gamma 2, smooth muscle, enteric                        |
| ENSG00000187068 | C3orf70     | -2.599340256        | chromosome 3 open reading frame 70                            |
| ENSG00000140937 | CDH11       | -3.118218115        | cadherin 11                                                   |
| ENSG00000250479 | CHCHD10     | -2.164889951        | coiled-coil-helix-coiled-coil-helix domain containing 10      |
| ENSG00000060718 | COL11A1     | -1.95561168         | collagen type XI alpha 1 chain                                |
| ENSG00000112297 | CRYBG1      | -1.554796347        | crystallin beta-gamma domain containing 1                     |
| ENSG00000138061 | CYP1B1      | -2.283155586        | cytochrome P450 family 1 subfamily B member 1                 |
| ENSG00000232973 | CYP1B1-AS1  | -1.709108114        | CYP1B1 antisense RNA 1                                        |
| ENSG00000164330 | EBF1        | -2.330896568        | EBF transcription factor 1                                    |
| ENSG00000122877 | EGR2        | -1.524158214        | early growth response 2                                       |
| ENSG00000158089 | GALNT14     | -1.542472136        | polypeptide N-acetylgalactosaminyltransferase 14              |
| ENSG00000168621 | GDNF        | -2.191316189        | glial cell derived neurotrophic factor                        |
| ENSG00000183671 | GPR1        | -1.732885264        | G protein-coupled receptor 1                                  |
| ENSG00000138646 | HERC5       | -3.863132591        | HECT and RLD domain containing E3 ubiquitin protein ligase 5  |
| ENSG00000103522 | IL21R       | -1.813038218        | interleukin 21 receptor                                       |
| ENSG00000154721 | JAM2        | -1.543157057        | junctional adhesion molecule 2                                |
| ENSG00000170745 | KCNS3       | -1.543157057        | potassium voltage-gated channel modifier subfamily S member 3 |
| ENSG00000196872 | KIAA1211L   | -1.97123368         | KIAA1211 like                                                 |
| ENSG00000128606 | LRRC17      | -3.979037697        | leucine rich repeat containing 17                             |
| ENSG00000135525 | MAP7        | -2.067185538        | microtubule associated protein 7                              |
| ENSG00000165175 | MID1IP1     | -1.723597971        | MID1 interacting protein 1                                    |
| ENSG00000184117 | NIPSNAP1    | -1.513382462        | nipsnap homolog 1                                             |
| ENSG00000176046 | NUPR1       | -2.466179682        | nuclear protein 1, transcriptional regulator                  |
| ENSG00000116329 | OPRD1       | -2.301979203        | opioid receptor delta 1                                       |
| ENSG00000280165 | PCDH20      | -1.627909227        | protocadherin 20                                              |
| ENSG00000196155 | PLEKHG4     | -2.538901757        | pleckstrin homology and RhoGEF domain containing G4           |

|                 |          |              |                                                                             |
|-----------------|----------|--------------|-----------------------------------------------------------------------------|
| ENSG00000054356 | PTPRN    | -2.208669559 | protein tyrosine phosphatase, receptor type N                               |
| ENSG00000100228 | RAB36    | -2.46722703  | RAB36, member RAS oncogene family                                           |
| ENSG00000202198 | RF00100  | -1.592322867 | Novel transcript                                                            |
| ENSG00000243742 | RPLP0P2  | -1.854651839 | ribosomal protein lateral stalk subunit P0 pseudogene 2                     |
| ENSG00000079102 | RUNX1T1  | -2.50721877  | RUNX1 translocation partner 1                                               |
| ENSG00000134548 | SPX      | -1.699360273 | spexin hormone                                                              |
| ENSG00000110719 | TCIRG1   | -2.871301647 | T cell immune regulator 1, ATPase H <sup>+</sup> transporting V0 subunit a3 |
| ENSG0000066056  | TIE1     | -1.757477046 | tyrosine kinase with immunoglobulin like and EGF like domains 1             |
| ENSG00000125355 | TMEM255A | -3.033187994 | transmembrane protein 255A                                                  |
| ENSG00000125657 | TNFSF9   | -1.591705506 | TNF superfamily member 9                                                    |
| ENSG00000170396 | ZNF804A  | -1.67965965  | zinc finger protein 804A                                                    |
