# Supplementary material for: Overexpression and Activation of αvβ3 Integrin Differentially Affects TGFβ2 Signaling in Human Trabecular Meshwork Cells
Source: MDPI journal article supplement (doi:10.3390/cells10081923), 2021-07-29
Supplement: s1 [file s1]

Table S7: Classification of Protein-Coding Transcripts Altered in WTβ3 and/ or CAβ3 cells.

Downregulated transcripts are in red and upregulated transcripts are in black. Those transcripts that were either downregulated or upregulated in both cell lines are in bold. KEGG, DAVID Bioinformatics Resources, the Matrisome database and UniProt were used to classify the transcripts. The Miscellaneous Bio-annotation includes proteins that currently have no classification.

| Bio-annotation                                                       | # of Genes | Genes in WTβ3 Cells                                                                                                                                                                                                                                                                                             | # of Genes | Genes in CAβ3 Cells                                                                                                                                                                                                                                                                                                                                                                                                                                                                                                                     |
|----------------------------------------------------------------------|------------|-----------------------------------------------------------------------------------------------------------------------------------------------------------------------------------------------------------------------------------------------------------------------------------------------------------------|------------|-----------------------------------------------------------------------------------------------------------------------------------------------------------------------------------------------------------------------------------------------------------------------------------------------------------------------------------------------------------------------------------------------------------------------------------------------------------------------------------------------------------------------------------------|
| Enzymes (includes protein kinases and glycosyltransferases)          | 30         | <b>PLCB1; CHAC1; MMP1;</b><br><b>HERC5; GALNT14; TIE1;</b><br><b>PTPRN; CYP1B1</b><br><b>QPRT; HUNK; CPA4; DTX1;</b><br><b>GALNT18; HS3ST3B1; GALC;</b><br><b>SMARCA2; ADCY1;</b><br><b>GUCY1A1; RIMKLA; RET;</b><br><b>SULF2; B3GALNT1; ENPP4;</b><br><b>CA9; PTGIS; CPS1; ATP8A2;</b><br><b>QPCT; GALNT14</b> | 69         | <b>PLCB1; CHAC1; MMP1;</b> PTGES; TENT5B;<br>EYA2; PLEK2; ARHGAP24; SGIP1; TNFAIP3;<br>CHST7; CHST6; PTPRO; ST6GALNAC5;<br>MME; FA2H; DUSP5; SIK1; PDF; PCSK1;<br>NUDT4B; EYA2; SPOCD1; PGBD5<br>QPRT; HUNK; SULF2; CPA4; DTX1;<br>GALNT18; HS3ST3B1; GALC; SMARCA2;<br>ADCY1; GUCY1A1; RIMKLA; RET; TLL1;<br>USP51; DIO2; ABCB1; OAS2; NUDT11;<br>PDE3A; KATNAL2; KYNU; DHRS2; EGLN3;<br>CA4; DDO; ACADS; GUCY1A2; FGFR2;<br>HPD; KSR2; CMPK2; OAS1; DTX4; SULF1;<br>PRSS12; PTP4A3; PDE5A; CHDH; PDE8B;<br>FGFR3; HR; CFI; ABAT; MEST |
| Membrane trafficking                                                 | 13         | <b>PLCB1; HCLS1; CCN3</b><br><b>MCF2L; LINGO1; GIPC3;</b><br><b>ITGB3; GAS7; RAPGEF4;</b><br><b>A2M; TBC1D8B; SH3GL2;</b><br><b>ADGRB1</b>                                                                                                                                                                      | 27         | <b>PLCB1; HCLS1; CCN3; SYTL3; RAB27B;</b><br><b>PLEK2; SGIP1; NRP2; ARHGAP24; MSLN</b><br><b>RAPGEF4; GIPC3; A2M; MCF2L; LINGO1;</b><br><b>ITGB3; GAS7; SYT13; SRGAP3; DENND2D;</b><br><b>ARHGAP22; DENND2C; DOC2B; AGAP2;</b><br><b>EXPH5; SYT1</b>                                                                                                                                                                                                                                                                                    |
| Transcription (includes transcription factors, nuclear receptors and | 19         | <b>KLF4; DDIT3; TBX18;</b><br><b>ZNF704; EBF1; EGR2;</b><br><b>RUNX1T1; NUPR1</b><br><b>ZNF677; ZC4H2; LMX1B;</b><br><b>NPAS3; AR; ZNF793; ZNF69;</b>                                                                                                                                                           | 57         | <b>KLF4; DDIT3; TBX18; ZNF704; FOSL1;</b><br><b>SP140; MAFF; KLF2; BNC1; RELB; RFX8;</b><br><b>EYA2; SPOCD1; LPXN</b><br><b>ZNF677; ZC4H2; LMX1B; NPAS3; ZNF793;</b><br><b>ZNF69; ZNF117; AR; SMARCA2; MNX1;</b>                                                                                                                                                                                                                                                                                                                        |

|                                                       |    |                                                                                                                                |    |                                                                                                                                                                                                                                         |
|-------------------------------------------------------|----|--------------------------------------------------------------------------------------------------------------------------------|----|-----------------------------------------------------------------------------------------------------------------------------------------------------------------------------------------------------------------------------------------|
| transcription machinery)                              |    | ZNF117; SMARCA2; MNX1; ZNF626                                                                                                  |    | EBF1; ISL1; SOX5; HOXC9; STAT5A; LHX1; PAX6; ALX4; LHX2; EBF4; DMRTA1; HOXA13; ZIC5; DLX4; FOXS1; ZNF347; ZNF429; ZNF730; ZNF641; MYCL; TXNIP; MYOCD; ZNF467; ZNF391; ZNF667; RASL11A; PPARGC1A; USP51; RNASEL; EID3; RGMA; HR; ATF7;   |
| Peptidases and inhibitors                             | 11 | ABHD8; MMP1; TIMP3<br>A2M; C4B; CPA4; PCSK1N;<br>CPS1; QPCT; ADGRB1;<br>SERPINB9                                               | 19 | ABHD8; MMP1; TIMP3; TNFAIP3; MME;<br>SERPINE1; BIRC3; PCSK1<br>A2M; C4B; CPA4; PCSK1N; TLL1; USP51;<br>C4A; PRSS12; ADGRL3; CFI; CPAMD8                                                                                                 |
| Exosome                                               | 10 | TCIRG1; ACTG2<br>ITGB3; C4B; A2M; SLC44A4;<br>PLP1; TUBA4A; TC2N; CETP                                                         | 19 | PARVB; MBP; MME; RAB27B; SERPINE1;<br>ANXA3; LPXN<br>ITGB3; C4B; A2M; ABCB1; MARVELD2;<br>CA4; C4A; HPD; EFN1; IFITM1; CFI;<br>CRYAB                                                                                                    |
| Cell adhesion molecules                               | 14 | NRCAM; CDH11; PCDH20;<br>JAM2<br>PCDHB13; PCDHB16; ITGB3;<br>PCDHB5; PCDHB12;<br>PODXL2 PCDHB10;<br>PCDHGB3; PCDHGB1;<br>TENM4 | 28 | NRCAM; MSLN; CNTN3; VCAM1;<br>PCDHGA6<br>PCDHB13; PCDHB16; ITGB3; PCDHB5;<br>PCDHB12; PODXL2; PCDHB10; DCHS1;<br>PCDH1; PCDHB11; IGDCC4; PCDH18;<br>CDH6; PCDHB14; NCAM2; SNED1;<br>ADGRL3; EFN1; TRO; CD33; MARVELD2;<br>FLRT3; LRFN5; |
| Cytoskeleton associated proteins                      | 10 | HCLS1; MYH15; ACTG2;<br>MAP7 KIAA1211L (CRACD)<br>GAS7; LRRC6; NHS;<br>TUBA4A; ADAP2                                           | 16 | HCLS1; MYH15; PARVB; VILL; MYBPH;<br>LPXN<br>GAS7; LRRC6; ANK3; TMSB15A; KATNAL2;<br>INA; IQGAP2; SORBS1; ABLIM1; RFLNA                                                                                                                 |
| Extracellular Matrix Associated Proteins <sup>1</sup> | 15 | MFAP2; MMP1; TNC; TIMP3<br>COL11A1; TIE1<br>VSTM2L; SULF2; A2M;<br>SRPX; POSTN; EMILIN1;<br>COL8A2; SERPINB9; SEMA5B;          | 29 | MFAP2; MMP1; TNC; TIMP3; VEGFA;<br>BMPER; SERPINE1; WNT7B; TNFAIP6;<br>COL13A1; GREM1<br>VSTM2L; SULF2; A2M; SRPX; SEMA6D;<br>MFAP4; FREM2; KAZALD1; SEMA6A;                                                                            |

|                                              |   |                                                                               |    |                                                                                                                                                                 |
|----------------------------------------------|---|-------------------------------------------------------------------------------|----|-----------------------------------------------------------------------------------------------------------------------------------------------------------------|
|                                              |   |                                                                               |    | SEMA3D; TLL1; COL14A1; VWA5A; WNT8B; SULF1; ANGPT1; EMILIN3; SPOCK1                                                                                             |
| G-protein coupled receptors                  | 6 | CMKLR1; OPRD1; GPR1<br>GPRC5C; GLP2R; ADGRB1;                                 | 10 | CMKLR1; HTR7<br>GPRC5C; GLP2R; SSTR2; S1PR5; ADRA2C; ADGRL3; ACKR1; GPR156;                                                                                     |
| Chromosome and associated proteins           | 6 | AUTS2; PPP2R2C;<br>SMARCA2; H4C6<br>(HIST1H4F); TUBA4A; SPAG4                 | 14 | H2BC6 (HIST1H2BE); PGBD5<br>AUTS2; PPP2R2C; SMARCA2; H4C6<br>(HIST1H4F); TSPYL5; USP51; SYCE2;<br>DCDC2; PPP2R2B; HR; USH1G; H1-<br>1(HIST1H1A)                 |
| Cytokine Interactions                        | 7 | GDF15; IL18; CD70; TNFSF9;<br>GDNF<br>TRIL; BMP3                              | 22 | GDF15; IL18; CD70; CSF3; INHBB; VEGFA;<br>IL1B; IL11; LIF; CXCL1; CXCL2; CXCL3;<br>CXCL5; CXCL8; TNFAIP3<br>TRIL; BMP3; ANGPT1; BMP4; TGFB2;<br>EFNB1; TRAF3IP3 |
| CD molecules                                 | 6 | CD70; EVI2A; JAM2; IL21R<br>ITGB3; CDCP1                                      | 17 | CD70; EVI2A; KLRC2; MME; CD274; CDCP1;<br>EVI2B; VCAM1<br>ITGB3; CD33; ABCB1; BST2; FGFR2; FGFR3;<br>IFITM1; ACKR1; NGFR                                        |
| Transporters                                 | 8 | ABCA8; C3orf18 (SLC35F6);<br>PENK<br>SLC22A17; CETP; SLC7A8;<br>SLC44A4; RBP7 | 17 | ABCA8; C3orf18 (SLC35F6); PENK; MFSD2A<br>SLC22A17; CNNM1; ABCB1; SLC7A14;<br>TMEM63C; NKAIN1; SLCO5A1; SLC8A2;<br>SLC29A3; IFITM1; ATCAY; SLC19A3; REEP1       |
| Ubiquitin system                             | 4 | TRIM6; HERC5<br>DTX1; KLHL13                                                  | 11 | TRIM6; BIRC3; KCTD14; TNFAIP3; TRIML2<br>DTX1; KLHL13; USP51; DTX4; KBTBD11;<br>ARRDC4                                                                          |
| Protein phosphatases and associated proteins | 3 | PCDH20; PTPRN<br>PPP2R2C                                                      | 11 | PTPRO; SPOCD1; PPP4R4; DUSP5; EYA2;<br>SYTL3 PPP2R2C; SLC7A14; PCDH1; PTP4A3;<br>PPP2R2B                                                                        |
| Ion channels                                 | 5 | KCNS3                                                                         | 15 | GRIN2A; KCNH2; TCAF2; FAM155B;<br>ANO1; ANO4; CACNA2D2; P2RX7; KCNT2;                                                                                           |

|                                             |    |                                                                                                                               |    |                                                                                                                                                                                                                                                  |
|---------------------------------------------|----|-------------------------------------------------------------------------------------------------------------------------------|----|--------------------------------------------------------------------------------------------------------------------------------------------------------------------------------------------------------------------------------------------------|
|                                             |    | GRIN2A; KCNH2; TCAF2;<br>FAM155B                                                                                              |    | KCNJ8; CHRNA2; SCN9A; CHRNA3; ITPR2;<br>TSPAN13                                                                                                                                                                                                  |
| Glycosaminoglycan<br>binding proteins       | 2  | TNC; COL11A1                                                                                                                  | 13 | TNC; IL1B; VEGFA; CXCL8; WNT7B;<br>COL13A1; SERPINE1; TNFAIP6<br>SLC8A2; FGFR2; BMP4; TGFB2; SLIT3                                                                                                                                               |
| mRNA biogenesis                             | 2  | PPP2R2C; TUBA4A                                                                                                               | 5  | TENT5B; GSPT2; MBP<br>PPP2R2C; PPP2R2B                                                                                                                                                                                                           |
| GTP-binding proteins                        | 7  | RAB36; PLEKHG4<br>RAPGEF4; MCF2L; DIRAS3;<br>RND2; ADAP2                                                                      | 9  | RHOD; RAB27B; ARHGAP24 (FILGAP)<br>RAPGEF4; MCF2L; IQGAP2; RUND3A;<br>SRGAP3; ARHGAP22                                                                                                                                                           |
| Cytochrome p450                             | 2  | CYP1B1; PTGIS                                                                                                                 | 0  |                                                                                                                                                                                                                                                  |
| Mitochondrial<br>biogenesis                 | 2  | GDAP1L1; CHCHD10                                                                                                              | 2  | GDAP1L1; PPARGC1A                                                                                                                                                                                                                                |
| Cytokine receptors                          | 3  | CMKLR1; IL21R<br>GHR                                                                                                          | 5  | CMKLR1; IL31RA<br>GHR; ACKR1; NGFR                                                                                                                                                                                                               |
| Chaperones and<br>folding catalysts         | 0  |                                                                                                                               | 4  | DNAJB9; PCSK1<br>DNAJC12; CRYAB                                                                                                                                                                                                                  |
| Spliceosome                                 | 0  |                                                                                                                               | 3  | RNVU1-7<br>NOVA2; SRSF8                                                                                                                                                                                                                          |
| DNA repair and<br>recombination<br>proteins | 0  |                                                                                                                               | 2  | PPP4R4<br>LRATD2 (FAM84B)                                                                                                                                                                                                                        |
| Ribosome biogenesis                         | 1  | ATP8A2                                                                                                                        | 0  |                                                                                                                                                                                                                                                  |
| Translation factors                         | 0  |                                                                                                                               | 1  | GSPT2                                                                                                                                                                                                                                            |
| Miscellaneous                               | 26 | IGFN1; MCTP1; PRTFDC1;<br>SDF2L1; FCRLA; HCLS1;<br>CRYBG1; ZNF804A;<br>TMEM255A; CHCHD10;<br>LRR17; SPX; NIPSNAP1;<br>MID1IP1 | 68 | IGFN1; MCTP1; PRTFDC1; SDF2L1; FCRLA;<br>HCLS1; LURAP1L; FAM167A; NUP50-DT;<br>TMEM158; ARMCX2; TM4SF19; SBSN;<br>ANKRD29; SH2D5; HPCAL1; TEX15; NPY;<br>DTNA; SCG2; PRUNE2; EMP1; PAQR5;<br>KDELC2; FCRLB; GCSAM; DKK1; S100A6;<br>DNER; PHLDA2 |

---

**CCDC181; H3BM21**  
**(AC068234.1); TMEM98;**  
**BEND4; PAIP2B; VANGL2;**  
PLAC8; CARD11; NMU

**CCDC181; H3BM21 (AC068234.1); TMEM98;**  
**BEND4; PAIP2B; VANGL2;** FAM49A;  
LYPD6B; FAM13C; FAM225A; ZNF608;  
ARMH4; TMEM130; AMOT; SAMD11;  
ENDOD1; NPR3; ZNF66; CASC10; CASC15;  
LAMP5; SELENOP; TSPAN11; DMKN;  
APOC1; OLFM1; SNCAIP; SLITRK6; DLL1;  
C4BPA; SMAD6; MAGEH1; PKIB; LIN7A;  
TOX; SAMD5; HHIPL2; EFHD1

---
