# Supplementary material for: Overexpression and Activation of αvβ3 Integrin Differentially Affects TGFβ2 Signaling in Human Trabecular Meshwork Cells
Source: MDPI journal article supplement (doi:10.3390/cells10081923), 2021-07-29
Supplement: s1 [file s1]

Table S1. Genes and transcripts uniquely upregulated in cells overexpressing a constitutively active  $\alpha v\beta 3$  integrin (CA $\beta 3$ ).

Log<sub>2</sub> fold change (FC) values were reported in DGE analysis using EdgeR, and genes and transcripts that demonstrated a Log<sub>2</sub>  $\geq$  1.5 FC were identified using R statistical computing and graphics software. Genes and transcripts are listed alphabetically.

| Ensembl ID      | Gene Symbol | Log <sub>2</sub> FC | Description                                                        |
|-----------------|-------------|---------------------|--------------------------------------------------------------------|
| ENSG00000183044 | ABAT        | 2.256388898         | 4-aminobutyrate aminotransferase                                   |
| ENSG00000085563 | ABCB1       | 3.532534991         | ATP binding cassette subfamily B member 1                          |
| ENSG00000099204 | ABLIM1      | 1.511933891         | actin binding LIM protein 1                                        |
| ENSG00000277200 | AC005696.4  | 2.216741844         | novel transcript                                                   |
| ENSG00000270953 | AC007938.3  | 2.168835492         | novel transcript, antisense to COPG2                               |
| ENSG00000260686 | AC008669.1  | 1.574254158         | novel transcript, overlapping SNX2                                 |
| ENSG00000259420 | AC046168.2  | 1.600563775         | novel transcript                                                   |
| ENSG00000254337 | AC083967.1  | 3.60611584          | novel transcript                                                   |
| ENSG00000253882 | AC099548.2  | 1.616126703         | family with sequence similarity 115, member C (FAM115C) pseudogene |
| ENSG00000280064 | AC130304.1  | 2.223498783         | novel transcript                                                   |
| ENSG00000280029 | AC244517.11 | 1.63522868          | novel transcript, antisense to multiple protocadherins             |
| ENSG00000122971 | ACADS       | 2.286363476         | acyl-CoA dehydrogenase short chain                                 |
| ENSG00000213088 | ACKR1       | 1.542919767         | atypical chemokine receptor 1 (Duffy blood group)                  |
| ENSG00000150471 | ADGRL3      | 1.592946906         | adhesion G protein-coupled receptor L3                             |
| ENSG00000184160 | ADRA2C      | 1.734597922         | adrenoceptor alpha 2C                                              |
| ENSG00000135439 | AGAP2       | 1.774980569         | ArfGAP with GTPase domain, ankyrin repeat and PH domain 2          |
| ENSG00000244306 | AL589743.1  | 3.742391421         | double homeobox A pseudogene 10                                    |
| ENSG00000052850 | ALX4        | 2.036922117         | ALX homeobox 4                                                     |
| ENSG00000126016 | AMOT        | 1.866977772         | angiomotin                                                         |
| ENSG00000154188 | ANGPT1      | 1.755336832         | angiopoietin 1                                                     |
| ENSG00000151150 | ANK3        | 4.2131673           | ankyrin 3                                                          |
| ENSG00000131620 | ANO1        | 5.375954302         | anoctamin 1                                                        |
| ENSG00000151572 | ANO4        | 3.875120707         | anoctamin 4                                                        |
| ENSG00000130208 | APOC1       | 2.54756142          | apolipoprotein C1                                                  |
| ENSG00000128805 | ARHGAP22    | 2.242518773         | Rho GTPase activating protein 22                                   |
| ENSG00000139971 | ARMH4       | 2.174504872         | armadillo-like helical domain containing 4                         |
| ENSG00000140450 | ARRDC4      | 2.441535194         | arrestin domain containing 4                                       |
| ENSG00000167654 | ATCAY       | 2.738693336         | ATCAY, caytaxin                                                    |
| ENSG00000267281 | ATF7        | 1.502525946         | activating transcription factor 7                                  |
| ENSG00000125378 | BMP4        | 1.69373196          | bone morphogenetic protein 4                                       |

|                 |          |             |                                                                  |
|-----------------|----------|-------------|------------------------------------------------------------------|
| ENSG00000130303 | BST2     | 2.323798203 | bone marrow stromal cell antigen 2                               |
| ENSG00000204128 | C2orf72  | 1.762305256 | chromosome 2 open reading frame 72                               |
| ENSG00000244731 | C4A      | 2.256993208 | complement C4A (Rodgers blood group)                             |
| ENSG00000233627 | C4A-AS1  | 2.251498766 | C4A antisense RNA 1                                              |
| ENSG00000229776 | C4B-AS1  | 2.251498251 | C4B antisense RNA 1                                              |
| ENSG00000123838 | C4BPA    | 2.260810571 | complement component 4 binding protein alpha                     |
| ENSG00000167434 | CA4      | 2.467907325 | carbonic anhydrase 4                                             |
| ENSG00000007402 | CACNA2D2 | 3.202452433 | calcium voltage-gated channel auxiliary subunit alpha2delta 2    |
| ENSG00000204682 | CASC10   | 1.620826016 | cancer susceptibility 10                                         |
| ENSG00000272168 | CASC15   | 1.516618832 | cancer susceptibility 15                                         |
| ENSG00000235505 | CASP17P  | 1.566517964 | caspase 17, pseudogene                                           |
| ENSG00000105383 | CD33     | 4.325270404 | CD33 molecule                                                    |
| ENSG00000113361 | CDH6     | 1.974390891 | cadherin 6                                                       |
| ENSG00000205403 | CFI      | 2.224593111 | complement factor I                                              |
| ENSG0000016391  | CHDH     | 1.670815676 | choline dehydrogenase                                            |
| ENSG00000080644 | CHRNA3   | 1.51109937  | cholinergic receptor nicotinic alpha 3 subunit                   |
| ENSG00000160716 | CHRNA2   | 1.673752734 | cholinergic receptor nicotinic beta 2 subunit                    |
| ENSG00000134326 | CMPK2    | 2.077095115 | cytidine/uridine monophosphate kinase 2                          |
| ENSG00000119946 | CNNM1    | 5.254651159 | cyclin and CBS domain divalent metal cation transport mediator 1 |
| ENSG00000187955 | COL14A1  | 3.854739343 | collagen type XIV alpha 1 chain                                  |
| ENSG00000160111 | CPAMD8   | 2.052001184 | C3 and PZP like, alpha-2-macroglobulin domain containing 8       |
| ENSG00000109846 | CRYAB    | 1.783410285 | crystallin alpha B                                               |
| ENSG00000146038 | DCDC2    | 2.025620559 | doublecortin domain containing 2                                 |
| ENSG00000166341 | DCHS1    | 3.649517957 | dachsous cadherin-related 1                                      |
| ENSG00000203797 | DDO      | 2.438540365 | D-aspartate oxidase                                              |
| ENSG00000175984 | DENND2C  | 1.950651673 | DENN domain containing 2C                                        |
| ENSG00000162777 | DENND2D  | 2.633573272 | DENN domain containing 2D                                        |
| ENSG00000100867 | DHRS2    | 2.49176263  | dehydrogenase/reductase 2                                        |
| ENSG00000211448 | DIO2     | 3.778409274 | iodothyronine deiodinase 2                                       |
| ENSG00000198719 | DLL1     | 2.280151082 | delta like canonical Notch ligand 1                              |
| ENSG00000108813 | DLX4     | 1.73845664  | distal-less homeobox 4                                           |
| ENSG00000161249 | DMKN     | 2.612747069 | dermokine                                                        |
| ENSG00000176399 | DMRTA1   | 1.89156894  | DMRT like family A1                                              |
| ENSG00000108176 | DNAJC12  | 1.764988821 | DnaJ heat shock protein family (Hsp40) member C12                |
| ENSG00000272636 | DOC2B    | 1.887570242 | double C2 domain beta                                            |
| ENSG00000110042 | DTX4     | 2.00222359  | deltex E3 ubiquitin ligase 4                                     |
| ENSG00000206195 | DUXAP8   | 5.462024248 | double homeobox A pseudogene 8                                   |
| ENSG00000225210 | DUXAP9   | 4.47599982  | double homeobox A pseudogene 9                                   |
| ENSG00000164330 | EBF1     | 1.521780981 | EBF transcription factor 1                                       |

|                 |           |             |                                                         |
|-----------------|-----------|-------------|---------------------------------------------------------|
| ENSG00000088881 | EBF4      | 1.907401158 | EBF family member 4                                     |
| ENSG00000115468 | EFHD1     | 2.412420969 | EF-hand domain family member D1                         |
| ENSG00000090776 | EFNB1     | 1.592375377 | ephrin B1                                               |
| ENSG00000129521 | EGLN3     | 2.471333522 | egl-9 family hypoxia inducible factor 3                 |
| ENSG00000255150 | EID3      | 1.503205019 | EP300 interacting inhibitor of differentiation 3        |
| ENSG00000183798 | EMILIN3   | 2.115591053 | elastin microfibril interfacier 3                       |
| ENSG00000149218 | ENDOD1    | 1.796242981 | endonuclease domain containing 1                        |
| ENSG00000110723 | EXPH5     | 1.581387874 | exophilin 5                                             |
| ENSG00000148541 | FAM13C    | 3.445075301 | family with sequence similarity 13 member C             |
| ENSG00000231528 | FAM225A   | 3.366294664 | family with sequence similarity 225 member A            |
| ENSG00000197872 | FAM49A    | 5.376146607 | family with sequence similarity 49 member A             |
| ENSG00000168672 | FAM84B    | 1.684450653 | family with sequence similarity 84 member B             |
| ENSG00000066468 | FGFR2     | 2.130842703 | fibroblast growth factor receptor 2                     |
| ENSG00000068078 | FGFR3     | 1.579742712 | fibroblast growth factor receptor 3                     |
| ENSG00000125848 | FLRT3     | 2.359363991 | fibronectin leucine rich transmembrane protein 3        |
| ENSG00000179772 | FOXS1     | 1.522172203 | forkhead box S1                                         |
| ENSG00000150893 | FREM2     | 1.619714094 | FRAS1 related extracellular matrix protein 2            |
| ENSG00000175697 | GPR156    | 1.983585789 | G protein-coupled receptor 156                          |
| ENSG00000152402 | GUCY1A2   | 2.277982645 | guanylate cyclase 1 soluble subunit alpha 2             |
| ENSG00000143512 | HHIPL2    | 1.575318095 | HHIP like 2                                             |
| ENSG00000124610 | HIST1H1A  | 1.713250253 | histone cluster 1 H1 family member a                    |
| ENSG00000240929 | HIST2H2BB | 2.949068636 | histone cluster 2 H2B family member b (pseudogene)      |
| ENSG00000214922 | HLA-F-AS1 | 1.98588527  | HLA-F antisense RNA 1                                   |
| ENSG00000106031 | HOXA13    | 1.858929908 | homeobox A13                                            |
| ENSG00000180806 | HOXC9     | 3.457987431 | homeobox C9                                             |
| ENSG00000158104 | HPD       | 2.114728298 | 4-hydroxyphenylpyruvate dioxygenase                     |
| ENSG00000168453 | HR        | 1.609404402 | HR, lysine demethylase and nuclear receptor corepressor |
| ENSG00000185885 | IFITM1    | 1.5650983   | interferon induced transmembrane protein 1              |
| ENSG00000103742 | IGDCC4    | 2.565077933 | immunoglobulin superfamily DCC subclass member 4        |
| ENSG00000148798 | INA       | 1.928314905 | internexin neuronal intermediate filament protein alpha |
| ENSG00000145703 | IQGAP2    | 2.585435746 | IQ motif containing GTPase activating protein 2         |
| ENSG00000016082 | ISL1      | 8.805295588 | ISL LIM homeobox 1                                      |
| ENSG00000123104 | ITPR2     | 1.589248734 | inositol 1,4,5-trisphosphate receptor type 2            |
| ENSG00000167216 | KATNAL2   | 2.632260749 | katanin catalytic subunit A1 like 2                     |
| ENSG00000107821 | KAZALD1   | 1.606322463 | Kazal type serine peptidase inhibitor domain 1          |
| ENSG00000176595 | KBTBD11   | 1.714191629 | kelch repeat and BTB domain containing 11               |

|                 |           |             |                                                                  |
|-----------------|-----------|-------------|------------------------------------------------------------------|
| ENSG00000121361 | KCNJ8     | 1.861351116 | potassium voltage-gated channel subfamily J member 8             |
| ENSG00000162687 | KCNT2     | 1.891171698 | potassium sodium-activated channel subfamily T member 2          |
| ENSG00000171435 | KSR2      | 2.088628339 | kinase suppressor of ras 2                                       |
| ENSG00000115919 | KYNU      | 2.626773304 | kynureninase                                                     |
| ENSG00000125869 | LAMP5     | 8.00250157  | lysosomal associated membrane protein family member 5            |
| ENSG00000273706 | LHX1      | 3.069492146 | LIM homeobox 1                                                   |
| ENSG00000106689 | LHX2      | 2.021636565 | LIM homeobox 2                                                   |
| ENSG00000111052 | LIN7A     | 1.812356832 | lin-7 homolog A, crumbs cell polarity complex component          |
| ENSG00000223764 | LINC02593 | 2.198344283 | long intergenic non-protein coding RNA 2593                      |
| ENSG00000165379 | LRFN5     | 1.620322171 | leucine rich repeat and fibronectin type III domain containing 5 |
| ENSG00000150556 | LYPD6B    | 4.182986106 | LY6/PLAUR domain containing 6B                                   |
| ENSG00000187601 | MAGEH1    | 1.964737303 | MAGE family member H1                                            |
| ENSG00000152939 | MARVELD2  | 2.541414652 | MARVEL domain containing 2                                       |
| ENSG00000106484 | MEST      | 2.178071159 | mesoderm specific transcript                                     |
| ENSG00000166482 | MFAP4     | 2.632730155 | microfibril associated protein 4                                 |
| ENSG00000116990 | MYCL      | 1.880524154 | MYCL proto-oncogene, bHLH transcription factor                   |
| ENSG00000141052 | MYOCD     | 2.935712892 | myocardin                                                        |
| ENSG00000154654 | NCAM2     | 1.778094671 | neural cell adhesion molecule 2                                  |
| ENSG00000064300 | NGFR      | 1.517925194 | nerve growth factor receptor                                     |
| ENSG00000084628 | NKAIN1    | 2.702347811 | sodium/potassium transporting ATPase interacting 1               |
| ENSG00000104967 | NOVA2     | 2.287692452 | NOVA alternative splicing regulator 2                            |
| ENSG00000113389 | NPR3      | 1.703228397 | natriuretic peptide receptor 3                                   |
| ENSG00000196368 | NUDT11    | 3.42875713  | nudix hydrolase 11                                               |
| ENSG00000089127 | OAS1      | 2.036647565 | 2'-5'-oligoadenylate synthetase 1                                |
| ENSG00000111335 | OAS2      | 3.445520531 | 2'-5'-oligoadenylate synthetase 2                                |
| ENSG00000130558 | OLFM1     | 2.543914395 | olfactomedin 1                                                   |
| ENSG00000089041 | P2RX7     | 2.132740668 | purinergic receptor P2X 7                                        |
| ENSG00000007372 | PAX6      | 2.78355498  | paired box 6                                                     |
| ENSG00000156453 | PCDH1     | 2.474464969 | protocadherin 1                                                  |
| ENSG00000189184 | PCDH18    | 2.023322132 | protocadherin 18                                                 |
| ENSG00000197479 | PCDHB11   | 2.088211962 | protocadherin beta 11                                            |
| ENSG00000120327 | PCDHB14   | 1.856173495 | protocadherin beta 14                                            |
| ENSG00000172572 | PDE3A     | 2.813567906 | phosphodiesterase 3A                                             |
| ENSG00000138735 | PDE5A     | 1.673816237 | phosphodiesterase 5A                                             |
| ENSG00000113231 | PDE8B     | 1.605860331 | phosphodiesterase 8B                                             |
| ENSG00000135549 | PKIB      | 1.8537746   | cAMP-dependent protein kinase inhibitor beta                     |

|                 |           |             |                                                                 |
|-----------------|-----------|-------------|-----------------------------------------------------------------|
| ENSG00000268894 | PLCE1-AS1 | 1.735792919 | PLCE1 antisense RNA 1                                           |
| ENSG00000109819 | PPARGC1A  | 1.634813801 | PPARG coactivator 1 alpha                                       |
| ENSG00000156475 | PPP2R2B   | 1.611738903 | protein phosphatase 2 regulatory subunit Bbeta                  |
| ENSG00000164099 | PRSS12    | 1.734692849 | serine protease 12                                              |
| ENSG00000184489 | PTP4A3    | 1.691988544 | protein tyrosine phosphatase type IVA, member 3                 |
| ENSG00000122035 | RASL11A   | 1.642121215 | RAS like family 11 member A                                     |
| ENSG00000068615 | REEP1     | 1.57995915  | receptor accessory protein 1                                    |
| ENSG00000178882 | RFLNA     | 1.618194549 | refilin A                                                       |
| ENSG00000182175 | RGMA      | 2.162076007 | repulsive guidance molecule BMP co-receptor a                   |
| ENSG00000135828 | RNASEL    | 2.141930762 | ribonuclease L                                                  |
| ENSG00000108309 | RUNDC3A   | 1.676870543 | RUN domain containing 3A                                        |
| ENSG00000180739 | S1PR5     | 1.904371805 | sphingosine-1-phosphate receptor 5                              |
| ENSG00000187634 | SAMD11    | 1.851289718 | sterile alpha motif domain containing 11                        |
| ENSG00000203727 | SAMD5     | 1.648288014 | sterile alpha motif domain containing 5                         |
| ENSG00000169432 | SCN9A     | 1.647541827 | sodium voltage-gated channel alpha subunit 9                    |
| ENSG00000250722 | SELENOP   | 3.82421175  | selenoprotein P                                                 |
| ENSG00000153993 | SEMA3D    | 1.502617479 | semaphorin 3D                                                   |
| ENSG00000092421 | SEMA6A    | 1.552206964 | semaphorin 6A                                                   |
| ENSG00000137872 | SEMA6D    | 4.348299959 | semaphorin 6D                                                   |
| ENSG00000135917 | SLC19A3   | 1.5873819   | solute carrier family 19 member 3                               |
| ENSG00000198246 | SLC29A3   | 1.985607806 | solute carrier family 29 member 3                               |
| ENSG00000013293 | SLC7A14   | 3.110401996 | solute carrier family 7 member 14                               |
| ENSG00000118160 | SLC8A2    | 2.207330186 | solute carrier family 8 member A2                               |
| ENSG00000137571 | SLCO5A1   | 2.570592907 | solute carrier organic anion transporter family member 5A1      |
| ENSG00000184347 | SLIT3     | 1.580583262 | slit guidance ligand 3                                          |
| ENSG00000184564 | SLITRK6   | 2.292534183 | SLIT and NTRK like family member 6                              |
| ENSG00000137834 | SMAD6     | 2.194589458 | SMAD family member 6                                            |
| ENSG00000064692 | SNCAIP    | 2.36271367  | synuclein alpha interacting protein                             |
| ENSG00000162804 | SNED1     | 1.585079371 | sushi, nidogen and EGF like domains 1                           |
| ENSG00000095637 | SORBS1    | 2.150794711 | sorbin and SH3 domain containing 1                              |
| ENSG00000134532 | SOX5      | 3.48665113  | SRY-box 5                                                       |
| ENSG00000152377 | SPOCK1    | 1.929077759 | SPARC (osteonectin), cwcv and kazal like domains proteoglycan 1 |
| ENSG00000196220 | SRGAP3    | 2.812733165 | SLIT-ROBO Rho GTPase activating protein 3                       |
| ENSG00000263465 | SRSF8     | 1.811135417 | serine and arginine rich splicing factor 8                      |
| ENSG00000180616 | SSTR2     | 2.280986901 | somatostatin receptor 2                                         |
| ENSG00000126561 | STAT5A    | 3.324090059 | signal transducer and activator of transcription 5A             |
| ENSG00000137573 | SULF1     | 1.75927283  | sulfatase 1                                                     |

|                 |          |             |                                                        |
|-----------------|----------|-------------|--------------------------------------------------------|
| ENSG00000161860 | SYCE2    | 2.186703216 | synaptonemal complex central element protein 2         |
| ENSG00000067715 | SYT1     | 2.003864654 | synaptotagmin 1                                        |
| ENSG00000019505 | SYT13    | 6.697589635 | synaptotagmin 13                                       |
| ENSG00000092969 | TGFB2    | 1.626821497 | transforming growth factor beta 2                      |
| ENSG00000038295 | TLL1     | 4.192038345 | tolloid like 1                                         |
| ENSG00000136404 | TM6SF1   | 1.630764059 | transmembrane 6 superfamily member 1                   |
| ENSG00000166448 | TMEM130  | 1.906319573 | transmembrane protein 130                              |
| ENSG00000165548 | TMEM63C  | 2.830172274 | transmembrane protein 63C                              |
| ENSG00000158164 | TMSB15A  | 2.838873916 | thymosin beta 15a                                      |
| ENSG00000198846 | TOX      | 1.719319293 | thymocyte selection associated high mobility group box |
| ENSG00000009790 | TRAF3IP3 | 2.134856223 | TRAF3 interacting protein 3                            |
| ENSG00000067445 | TRO      | 1.525528714 | trophinin                                              |
| ENSG00000110900 | TSPAN11  | 2.630188384 | tetraspanin 11                                         |
| ENSG00000106537 | TSPAN13  | 1.566201983 | tetraspanin 13                                         |
| ENSG00000180543 | TSPYL5   | 4.230885119 | TSPY like 5                                            |
| ENSG00000265972 | TXNIP    | 3.636536214 | thioredoxin interacting protein                        |
| ENSG00000182040 | USH1G    | 2.221624322 | USH1 protein network component sans                    |
| ENSG00000247746 | USP51    | 4.022077134 | ubiquitin specific peptidase 51                        |
| ENSG00000110002 | VWA5A    | 2.672650886 | von Willebrand factor A domain containing 5A           |
| ENSG00000075290 | WNT8B    | 1.904178673 | Wnt family member 8B                                   |
| ENSG00000139800 | ZIC5     | 1.790234979 | Zic family member 5                                    |
| ENSG00000197937 | ZNF347   | 1.778591999 | zinc finger protein 347                                |
| ENSG00000124613 | ZNF391   | 1.928408869 | zinc finger protein 391                                |
| ENSG00000197013 | ZNF429   | 1.55858418  | zinc finger protein 429                                |
| ENSG00000181444 | ZNF467   | 2.758067157 | zinc finger protein 467                                |
| ENSG00000168916 | ZNF608   | 2.634700126 | zinc finger protein 608                                |
| ENSG00000167528 | ZNF641   | 2.166121039 | zinc finger protein 641                                |
| ENSG00000160229 | ZNF66    | 1.669039302 | zinc finger protein 66                                 |
| ENSG00000198046 | ZNF667   | 1.685608926 | zinc finger protein 667                                |
| ENSG00000183850 | ZNF730   | 1.556097598 | zinc finger protein 730                                |
