# Supplementary material for: Overexpression and Activation of αvβ3 Integrin Differentially Affects TGFβ2 Signaling in Human Trabecular Meshwork Cells
Source: MDPI journal article supplement (doi:10.3390/cells10081923), 2021-07-29
Supplement: s1 [file s1]

Table S3. Genes and transcripts uniquely upregulated in cells overexpressing a wild type  $\alpha v\beta 3$  integrin (WT $\beta 3$ ).

Log<sub>2</sub> fold change (FC) values were reported in DGE analysis using EdgeR, and genes and transcripts that demonstrated a Log<sub>2</sub>  $\geq 1.5$  FC were identified using R statistical computing and graphics software. Genes and transcripts are listed alphabetically.

| Ensembl ID      | Gene Symbol | Log <sub>2</sub> FC | Description                                                          |
|-----------------|-------------|---------------------|----------------------------------------------------------------------|
| ENSG00000277013 | AC008556.1  | 1.657490119         | novel transcript                                                     |
| ENSG00000184060 | ADAP2       | 3.073455205         | ArfGAP with dual PH domains 2                                        |
| ENSG00000181790 | ADGRB1      | 3.106749323         | adhesion G protein-coupled receptor B1                               |
| ENSG00000270149 | AL591806.3  | 8.436492105         | novel transcript, TSTD1 - F11R readthrough                           |
| ENSG00000132932 | ATP8A2      | 2.164585395         | ATPase phospholipid transporting 8A2                                 |
| ENSG00000169255 | B3GALNT1    | 2.164585395         | beta-1,3-N-acetylgalactosaminyltransferase 1 (globoside blood group) |
| ENSG00000107159 | CA9         | 2.433175167         | carbonic anhydrase 9                                                 |
| ENSG00000198286 | CARD11      | 2.690665088         | caspase recruitment domain family member 11                          |
| ENSG00000163814 | CDCP1       | 3.17818399          | CUB domain containing protein 1                                      |
| ENSG00000087237 | CETP        | 2.085407427         | cholesteryl ester transfer protein                                   |
| ENSG00000171812 | COL8A2      | 2.714186924         | collagen type VIII alpha 2 chain                                     |
| ENSG00000021826 | CPS1        | 1.564300489         | carbamoyl-phosphate synthase 1                                       |
| ENSG00000231890 | DARS-AS1    | 1.552175281         | DARS antisense RNA 1                                                 |
| ENSG00000162595 | DIRAS3      | 1.935173921         | DIRAS family GTPase 3                                                |
| ENSG00000138080 | EMILIN1     | 1.508876998         | elastin microfibril interfacier 1                                    |
| ENSG00000001561 | ENPP4       | 5.009830622         | ectonucleotide pyrophosphatase/phosphodiesterase 4                   |
| ENSG00000088340 | FER1L4      | 1.796113673         | fer-1 like family member 4, pseudogene                               |
| ENSG00000280614 | FP236383.2  | 4.542337024         | novel transcript, similar to YY1 associated myogenesis RNA 1 YAM1    |
| ENSG00000281181 | FP236383.3  | 4.542337024         | novel transcript, similar to YY1 associated myogenesis RNA 1 YAM1    |
| ENSG00000280800 | FP671120.4  | 4.542337024         | novel transcript, similar to YY1 associated myogenesis RNA 1 YAM1    |
| ENSG00000188158 | NHS         | 1.540047318         | NHS actin remodeling regulator                                       |
| ENSG00000109255 | NMU         | 1.704840634         | neuromedin U                                                         |
| ENSG00000254221 | PCDHGB1     | 1.589513607         | protocadherin gamma subfamily B, 1                                   |
| ENSG00000262209 | PCDHGB3     | 1.728711002         | protocadherin gamma subfamily B, 3                                   |
| ENSG00000145287 | PLAC8       | 1.531485644         | placenta specific 8                                                  |
| ENSG00000123560 | PLP1        | 1.51588585          | proteolipid protein 1                                                |
| ENSG00000133110 | POSTN       | 3.883827359         | periostin                                                            |
| ENSG00000124212 | PTGIS       | 1.885897532         | prostaglandin I2 synthase                                            |
| ENSG00000115828 | QPCT        | 1.697237523         | glutaminyl-peptide cyclotransferase                                  |

|                 |           |             |                                                     |
|-----------------|-----------|-------------|-----------------------------------------------------|
| ENSG00000162444 | RBP7      | 1.925243446 | retinol binding protein 7                           |
| ENSG00000277739 | RF00002   | 3.077239388 | NA                                                  |
| ENSG00000278189 | RNA5-8SN1 | 3.077239388 | RNA, 5.8S ribosomal N1                              |
| ENSG00000278233 | RNA5-8SN2 | 3.077239388 | RNA, 5.8S ribosomal N2                              |
| ENSG00000275215 | RNA5-8SN3 | 3.077239388 | RNA, 5.8S ribosomal N3                              |
| ENSG00000108830 | RND2      | 2.915506786 | Rho family GTPase 2                                 |
| ENSG00000234498 | RPL13AP20 | 1.827936454 | ribosomal protein L13a pseudogene 20                |
| ENSG00000082684 | SEMA5B    | 1.767279762 | semaphorin 5B                                       |
| ENSG00000170542 | SERPINB9  | 3.241317149 | serpin family B member 9                            |
| ENSG00000107295 | SH3GL2    | 2.298341516 | SH3 domain containing GRB2 like 2,<br>endophilin A1 |
| ENSG00000237914 | SIRPG-AS1 | 2.12244344  | SIRPG antisense RNA 1                               |
| ENSG00000204385 | SLC44A4   | 2.745910205 | solute carrier family 44 member 4                   |
| ENSG00000092068 | SLC7A8    | 1.93808603  | solute carrier family 7 member 8                    |
| ENSG00000061656 | SPAG4     | 1.742403165 | sperm associated antigen 4                          |
| ENSG00000133138 | TBC1D8B   | 1.621959679 | TBC1 domain family member 8B                        |
| ENSG00000165929 | TC2N      | 1.509119834 | tandem C2 domains, nuclear                          |
| ENSG00000149256 | TENM4     | 4.540006466 | teneurin transmembrane protein 4                    |
| ENSG00000127824 | TUBA4A    | 1.664284445 | tubulin alpha 4a                                    |
| ENSG00000188171 | ZNF626    | 1.929448374 | zinc finger protein 626                             |
